# Supplementary material for: Polymerization-induced self-assembly via RAFT in emulsion: effect of Z-group on the nucleation step
Source: Royal Society of Chemistry journal article supplement (doi:10.1039/d0py01311k), 2020-10-16
Supplement: d0py01311k1.pdf [file d0py01311k1.pdf]

## Supporting Information

### **Polymerization-Induced Self-Assembly via RAFT in Emulsion: Effect of Z-Group on the Nucleation Step**

Thiago R. Guimarães,<sup>1</sup> Yuen L. Bong,<sup>1</sup> Steven W. Thompson,<sup>1</sup> Graeme Moad,<sup>2</sup> Sébastien Perrier<sup>3,4,5</sup> and Per B. Zetterlund<sup>1,\*</sup>

<sup>1</sup> Centre for Advanced Macromolecular Design (CAMD), School of Chemical Engineering, The University of New South Wales, Sydney, NSW, 2052, Australia.

<sup>2</sup> CSIRO Manufacturing Flagship, Bag 10, Clayton South, VIC 3169, Australia.

<sup>3</sup> Department of Chemistry, University of Warwick, Coventry, CV4 7AL, UK.

<sup>4</sup> Warwick Medical School, University of Warwick, Coventry, CV4 7AL, UK

<sup>5</sup> Faculty of Pharmacy and Pharmaceutical Sciences, Monash University, 381 Royal Parade, Parkville, Victoria 3052, Australia

#### **Contents**

|      |                                                 |   |
|------|-------------------------------------------------|---|
| 1.1. | Characterization of hydrophilic macroRAFT ..... | 2 |
| 1.2. | Additional results for PISA polymerization..... | 2 |

## 1.1. Synthesis and characterization of hydrophilic macroRAFT agents

Table S1 – Synthesis of hydrophilic macroRAFT agents via solution polymerization using RAFT agents with different Z-groups.<sup>a</sup>

| MacroRAFT                            | RAFT agent | [Mon] (mol L <sup>-1</sup> ) | [Mon]/[RAFT] | [RAFT]/[I] | X (%) / t (h) <sup>b</sup> | <i>M</i> <sub>n,th</sub> <sup>c</sup> | <i>M</i> <sub>n</sub> / <i>D</i> <sup>d</sup> | <i>L</i> (%) <sup>e</sup> |
|--------------------------------------|------------|------------------------------|--------------|------------|----------------------------|---------------------------------------|-----------------------------------------------|---------------------------|
| PMAA <sub>24</sub> -Ac               | RAFT1      | 0.9                          | 24           | 34         | 99/22                      | 2380                                  | 2350/1.14                                     | 96.6                      |
| PMAA <sub>40</sub> -Ac               | RAFT1      | 1.0                          | 44           | 39         | 99/22                      | 4050                                  | 3830/1.13                                     | 97.2                      |
| PMAA <sub>43</sub> -C4               | RAFT2      | 1.0                          | 43           | 40         | 98/24                      | 3980                                  | 3930/1.13                                     | 96.8                      |
| PMAA <sub>38</sub> -C12 <sup>f</sup> | RAFT3      | 2.4                          | 50           | 20         | 77/6                       | 3712                                  | 4510/1.22                                     | 95.1                      |
| PAA <sub>43</sub> -Ac                | RAFT1      | 1.0                          | 42           | 40         | 100/24                     | 3320                                  | 2860/1.10                                     | 98.5                      |
| PAA <sub>40</sub> -C4                | RAFT4      | 1.8                          | 40           | 38         | 99/22                      | 3130                                  | 2940/1.10                                     | 98.5                      |
| PAA <sub>46</sub> -C12 <sup>f</sup>  | RAFT5      | 3.0                          | 48           | 20         | 96/6                       | 3690                                  | 3370/1.15                                     | 97.5                      |

<sup>a</sup>T = 80°C; Volume = 10-20 mL. <sup>b</sup>Conversion by <sup>1</sup>H NMR. <sup>c</sup>Theoretical *M*<sub>n</sub> calculated according to equation 2. <sup>d</sup>Experimental number-average molar mass and dispersity determined either by SEC in THF based on conventional calibration using PMMA standards. <sup>e</sup>Livingness calculated according to equation 2. Water was used as solvent except for <sup>f</sup> performed in dioxane.

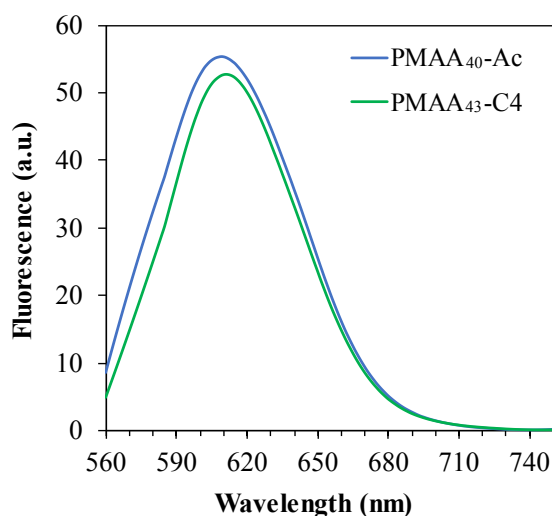

**Figure S1** – Fluorescence spectra of PMAA-based macroRAFTs in aqueous solution at pH 3 using Nile red as solvachromatic dye with excitation wavelength at 550 nm. The excitation bandwidth was set at 3.0 nm and the emission bandwidth at 1.5 nm.

## 1.2. Additional PISA results

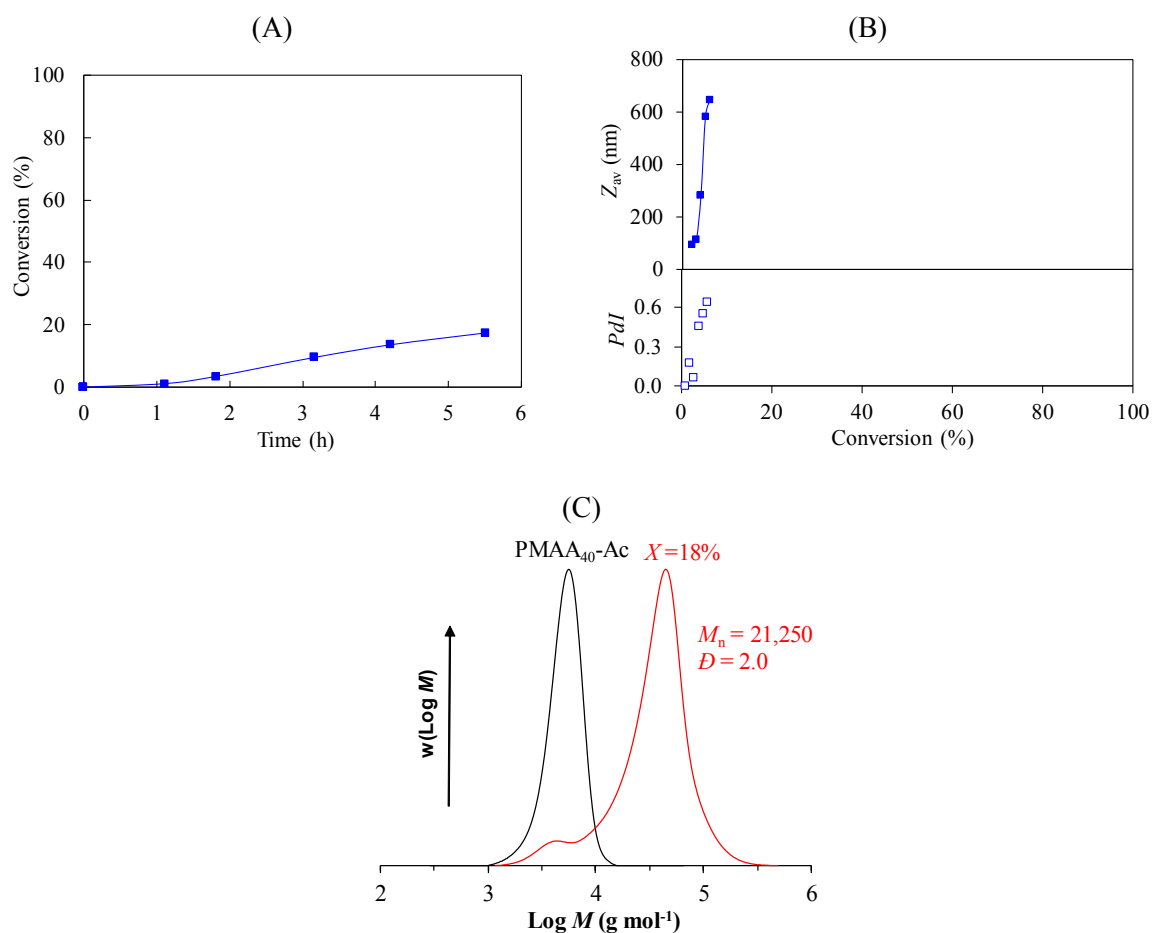

**Figure S2** –PISA of styrene using PMAA<sub>40</sub>-Ac macroRAFT and ACPA as initiator. (A) Conversion-time data plot, (B) intensity-mean average diameter ( $Z_{av}$ ) and dispersity index (PDI) and (C) THF-SEC traces based on PS calibration curve. The formulation was based on Latex 2 but targeting a higher DP of 1200 and using ACPA as initiator. SC = 20%; T = 80°C; [RAFT]/[I] = 5; [Mon]/[RAFT] = 1200; pH<sub>0</sub> = 2.5. [NaHCO<sub>3</sub>]/[ACPA] = 3.5 was used to dissolve ACPA in water.

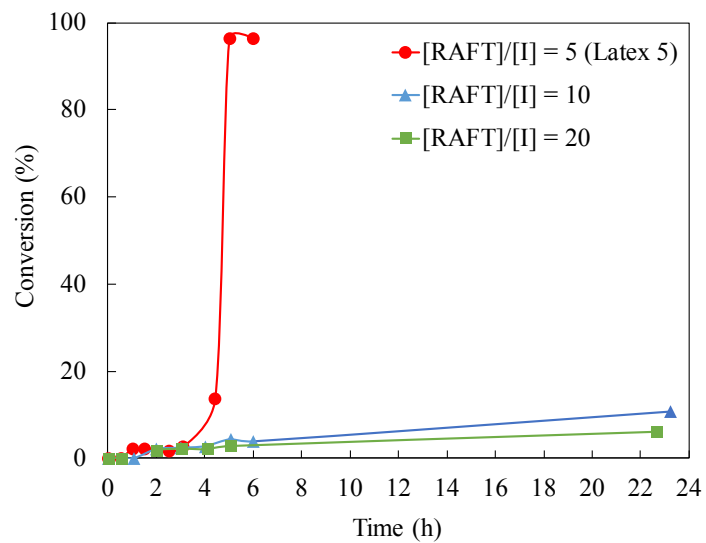

**Figure S3** – Conversion-time data for PISA of styrene using PAA<sub>43</sub>-Ac macroRAFT at different [RAFT]/[I] ratios. The formulations were based on Latex 5 but using a lower concentration of initiator at [RAFT]/[I] = 10 and 20.
